# Supplementary material for: Bi-allelic loss-of-function variants in KIF21A cause severe fetal akinesia with arthrogryposis multiplex
Source: PubMed Central journal article supplement — J Med Genet. 2021 Nov 5;60(1):48–56. doi: 10.1136/jmedgenet-2021-108064 (PMC9811090; doi:10.1136/jmedgenet-2021-108064), 2021-11-05
Supplement: jmedgenet-2021-108064supp001.pdf [file jmedgenet-2021-108064supp001.pdf]

Table S1. Clinical details of investigated individuals without molecular cause identified

| Patient ID # | Family # | Gender / age at inclusion termination of pregnancy | Affected gene           | Prenatal abnormalities                          | Joint contractures (prenatal or postnatal)             | Dysmorphic features                                                      | Neurological abnormalities                                        | Other features                                                                                                                                                                                                                                    |
|--------------|----------|----------------------------------------------------|-------------------------|-------------------------------------------------|--------------------------------------------------------|--------------------------------------------------------------------------|-------------------------------------------------------------------|---------------------------------------------------------------------------------------------------------------------------------------------------------------------------------------------------------------------------------------------------|
| F16:II.1     | 16       | m / 3 mo                                           | no causal variant found | RFM, genu valgum                                | Elbows, wrists, knees, talipes equinovarus (bilateral) | Sandal gap (bilateral)                                                   | –                                                                 | –                                                                                                                                                                                                                                                 |
| F17:II.1     | 17       | m / TOP (35 WGA)                                   | no causal variant found | RFM                                             | Elbows, wrists, knees, talipes equinovarus (bilateral) | ND (autopsy not performed)                                               | –                                                                 | –                                                                                                                                                                                                                                                 |
| F18:II.1     | 18       | f / 3 y                                            | no causal variant found | RFM, polyhydramnios                             | Elbows, hips, knees, talipes equinovarus (bilateral)   | Naevus flammeus, joint dimples                                           | Global developmental delay, choroid plexus cyst, muscle weakness  | Hip luxation (bilateral), deformed ribs, scoliosis                                                                                                                                                                                                |
| F19:II.1     | 19       | f / TOP (22 WGA)                                   | no causal variant found | RFM, vitium cordis, shortened trunk             | Fingers, wrists, knees, crossed fingers, pointed feet  | ND (autopsy not performed)                                               | Spina bifida, corpus callosum agenesis, severe spinal deformation | –                                                                                                                                                                                                                                                 |
| F20:II.1     | 20       | m / TOP (19 WGA)                                   | no causal variant found | RFM, IUGR, hydrothorax, singular umbilical cord | Elbows, knees, talipes equinovarus (bilateral)         | Retrognathia, syndactyly left hand (3th-5th digit), prominent nasal root | –                                                                 | Anal atresia, pulmonary hypoplasia, hydrothorax, pericardial effusion, malrotation of the bowel, spherical pancreas, horseshoe kidneys, dilated heart atria, agenesis of the left umbilical artery, scoliosis, absence of os frontale (bilateral) |
| F21:II.1     | 21       | f / 8 y                                            | no causal variant found | RFM, oligohydramnios, short long tubular bones  | Elbows, knees, hips, talipes equinovarus (bilateral)   | –                                                                        | Cognitive impairment                                              | Hip luxation                                                                                                                                                                                                                                      |

List of genetic variants and clinical details of the cohort sorted by disease-causal genetic defects in known FA-associated genes, cases with variants of unknown significance, unsolved patients, and patients carrying bi-allelic variants in the candidate gene *KIF21A*. Provided information include patient ID, family ID, gender, age at inclusion or death in months and years or termination of pregnancy in weeks of gestational age. Age 0 denotes children dying < 1 month after birth. Additionally, provided data include the affected gene, RefSeq ID, DNA change, AA change, variant classification (ACMG scores), gene-associated OMIM-phenotypes, mode of inheritance, and zygosity. Furthermore, it is indicated whether variants have already been published independently (with corresponding PubMed ID) or not. The variant nomenclature is in accordance with Human Genome Variation Society (HGVS) standards.

f death, AA amino acid, ACMG American College of Medical Genetics and Genomics, AD autosomal dominant, AR autosomal recessive, f female, IUGR intrauterine growth restriction, m male, mo month, ND no data, NIV non-invasive ventilation, OMIM Online Mendelian Inheritance in Man, PMID PubMed ID, RFM reduced fetal movements, RI respiratory insufficiency, TOP termination of pregnancy, VUS variant of uncertain significance in the ACMG classification system, WGA weeks of gestational age, y years.
