# Supplementary material for: Bi-allelic loss-of-function variants in KIF21A cause severe fetal akinesia with arthrogryposis multiplex
Source: PubMed Central journal article supplement — J Med Genet. 2021 Nov 5;60(1):48–56. doi: 10.1136/jmedgenet-2021-108064 (PMC9811090; doi:10.1136/jmedgenet-2021-108064), 2021-11-05
Supplement: jmedgenet-2021-108064supp003.pdf [file jmedgenet-2021-108064supp003.pdf]

Table S2. Detailed clinical summary of the affected fetuses of families 22 and 23 with variants in *KIF21A* (NM\_001173464.2)

| Family<br>Genotype                         | Family 22<br>c.1346T>A, (p.Leu449*) homozygous          |                                                                                                                                          |                                                                  |                                                                                      | Family 23<br>c.2371del, (p.Arg791Glufs*8) homozygous |                                   |                    |                                      |                   |
|--------------------------------------------|---------------------------------------------------------|------------------------------------------------------------------------------------------------------------------------------------------|------------------------------------------------------------------|--------------------------------------------------------------------------------------|------------------------------------------------------|-----------------------------------|--------------------|--------------------------------------|-------------------|
|                                            | 22:II.1<br>male                                         |                                                                                                                                          | 22:II.2<br>female                                                |                                                                                      | 22:II.4<br>male                                      |                                   | 23:II.1<br>male    |                                      | 23:II.2<br>female |
|                                            | prenatal ultrasound<br>(WGA 22+2)                       | autopsy (WGA 23+5)                                                                                                                       | prenatal ultrasound<br>(WGA 23+3)                                | autopsy (WGA 25+1)                                                                   | prenatal ultrasound<br>(WGA 19+0)                    | prenatal ultrasound<br>(WGA 25+5) | autopsy (WGA 30+3) | prenatal ultrasound<br>(WGA 21+0)    |                   |
| RFM                                        | Yes                                                     | –                                                                                                                                        | Yes                                                              | –                                                                                    | Yes                                                  | –                                 | –                  | Yes                                  |                   |
| IUGR                                       | –                                                       | –                                                                                                                                        | Yes                                                              | –                                                                                    | –                                                    | –                                 | –                  | –                                    |                   |
| Polyhydramnios                             | Yes                                                     | –                                                                                                                                        | Yes                                                              | –                                                                                    | –                                                    | –                                 | Yes                | –                                    |                   |
| Cerebral ventriculomegaly                  | –                                                       | –                                                                                                                                        | –                                                                | –                                                                                    | –                                                    | –                                 | Yes                | ND (autolysis)                       |                   |
| Brachycephaly                              | –                                                       | –                                                                                                                                        | –                                                                | –                                                                                    | –                                                    | –                                 | Yes                | ND (autolysis)                       |                   |
| Scalp edema                                | Yes                                                     | –                                                                                                                                        | Yes                                                              | –                                                                                    | –                                                    | –                                 | Yes                | Yes (with protruding skull bones)    |                   |
| Neck edema                                 | –                                                       | –                                                                                                                                        | –                                                                | –                                                                                    | Yes                                                  | –                                 | Yes                | –                                    |                   |
| Hypertelorism                              | –                                                       | Yes                                                                                                                                      | –                                                                | –                                                                                    | –                                                    | –                                 | –                  | –                                    |                   |
| Low-set ears                               | –                                                       | Yes                                                                                                                                      | Yes                                                              | ND                                                                                   | –                                                    | –                                 | –                  | ND                                   |                   |
| Flat broad nose                            | –                                                       | Yes                                                                                                                                      | –                                                                | –                                                                                    | ND                                                   | –                                 | –                  | –                                    |                   |
| Prenasal edema                             | –                                                       | –                                                                                                                                        | –                                                                | –                                                                                    | ND                                                   | –                                 | Yes                | ND (autolysis)                       |                   |
| Cleft-palate of the hard and soft palate   | –                                                       | Yes (hard and soft palate)                                                                                                               | –                                                                | Yes (median cleft of the soft palate)                                                | –                                                    | –                                 | ND                 | –                                    |                   |
| Microglossia                               | –                                                       | –                                                                                                                                        | –                                                                | Yes                                                                                  | –                                                    | –                                 | –                  | –                                    |                   |
| Micrognathia                               | –                                                       | –                                                                                                                                        | Yes                                                              | Yes                                                                                  | Yes                                                  | –                                 | Yes                | Yes                                  |                   |
| Retrognathia                               | Yes                                                     | Yes                                                                                                                                      | Yes                                                              | Yes                                                                                  | –                                                    | –                                 | Yes                | Yes                                  |                   |
| High-arched palate                         | –                                                       | –                                                                                                                                        | –                                                                | Yes                                                                                  | –                                                    | –                                 | –                  | –                                    |                   |
| Thoracic / Pulmonary hypoplasia            | Yes                                                     | Yes                                                                                                                                      | Yes                                                              | Yes                                                                                  | Yes                                                  | –                                 | Yes                | Yes                                  |                   |
| Hydrothorax                                | –                                                       | –                                                                                                                                        | Yes                                                              | –                                                                                    | –                                                    | –                                 | –                  | –                                    |                   |
| Cardial abnormalities                      | –                                                       | –                                                                                                                                        | –                                                                | –                                                                                    | –                                                    | –                                 | Yes (dextrocardia) | Yes (dextrocardia)                   |                   |
| Gastrointestinal abnormalities             | Yes (diaphragmatic protrusion, missing stomach filling) | ND (autolysis)                                                                                                                           | Yes (diaphragmatic protrusion, missing stomach filling, ascites) | Jejunal perforation                                                                  | ND                                                   | –                                 | –                  | Yes (missing stomach filling)        |                   |
| Urogenital abnormalities                   | –                                                       | –                                                                                                                                        | –                                                                | Dilated tortuous ureter (bilateral)                                                  | –                                                    | –                                 | –                  | –                                    |                   |
| Abnormalities of joints / spine / muscles: |                                                         |                                                                                                                                          |                                                                  |                                                                                      |                                                      |                                   |                    |                                      |                   |
| Anomalies of the spine                     | Yes (thoracic kyphoscoliosis)                           | Yes (thoracic kyphoscoliosis)                                                                                                            | –                                                                | Yes (thoracic scoliosis, additional cervical rib (origin: sixth cervical vertebrae)) | ND                                                   | –                                 | –                  | –                                    |                   |
| Straight ribs                              | –                                                       | Yes                                                                                                                                      | –                                                                | Yes                                                                                  | –                                                    | –                                 | –                  | –                                    |                   |
| Narrow long tubular bones                  | –                                                       | Yes                                                                                                                                      | –                                                                | Yes                                                                                  | –                                                    | –                                 | –                  | –                                    |                   |
| Internally rotated shoulders               | –                                                       | Yes (bilateral)                                                                                                                          | –                                                                | Yes (bilateral)                                                                      | –                                                    | –                                 | –                  | –                                    |                   |
| Elbow fixed in flexion                     | Yes                                                     | –                                                                                                                                        | Yes                                                              | –                                                                                    | –                                                    | –                                 | –                  | –                                    |                   |
| Elbow fixed in extension                   | –                                                       | Yes                                                                                                                                      | –                                                                | Yes                                                                                  | –                                                    | –                                 | –                  | –                                    |                   |
| Wrist fixed in flexion                     | Yes                                                     | Yes                                                                                                                                      | –                                                                | –                                                                                    | –                                                    | –                                 | Yes (bilateral)    | Yes (bilateral)                      |                   |
| Clinodactyly                               | –                                                       | –                                                                                                                                        | –                                                                | –                                                                                    | –                                                    | –                                 | Yes (bilateral)    | Yes (DII, bilateral)                 |                   |
| Clenched hands with crossing fingers       | Yes                                                     | Yes (with bilateral infolded thumb; left: DII over DI, DIII-DV fixed in middle joint; right: DIII-DV over DI, DII fixed in middle joint) | Yes (bilateral)                                                  | Yes (with bilateral infolded thumb; left: DII-DIII over DI; right: DII-DV over DI)   | –                                                    | –                                 | Yes (bilateral)    | Yes (with infolded thumb, bilateral) |                   |
| Femoral anteversion                        | –                                                       | –                                                                                                                                        | –                                                                | Yes (bilateral)                                                                      | –                                                    | –                                 | –                  | –                                    |                   |
| Knee joint fixed in extension              | Yes                                                     | Yes (bilateral)                                                                                                                          | Yes (bilateral)                                                  | Yes (bilateral)                                                                      | Yes (bilateral)                                      | –                                 | –                  | Yes (unilateral)                     |                   |
| Knee joint fixed in flexion                | –                                                       | –                                                                                                                                        | –                                                                | –                                                                                    | –                                                    | –                                 | –                  | Yes (unilateral)                     |                   |
| Genu recurvatum                            | –                                                       | –                                                                                                                                        | –                                                                | Yes (bilateral)                                                                      | –                                                    | –                                 | –                  | –                                    |                   |
| Pes equinovarus                            | Yes (bilateral)                                         | Yes (bilateral)                                                                                                                          | Yes (bilateral)                                                  | Yes (bilateral)                                                                      | Yes (bilateral)                                      | Yes (bilateral)                   | Yes (bilateral)    | Yes (bilateral)                      |                   |
| Rocker bottom foot                         | –                                                       | –                                                                                                                                        | –                                                                | –                                                                                    | –                                                    | –                                 | Yes (bilateral)    | –                                    |                   |
| Hypotrophic muscles of the lower legs      | Yes                                                     | –                                                                                                                                        | –                                                                | –                                                                                    | –                                                    | –                                 | –                  | –                                    |                   |

ND no data, IUGR intrauterine growth restriction, RFM reduced fetal movements, WGA weeks of gestational age
