# Supplementary material for: Bi-allelic loss-of-function variants in KIF21A cause severe fetal akinesia with arthrogryposis multiplex
Source: PubMed Central journal article supplement — J Med Genet. 2021 Nov 5;60(1):48–56. doi: 10.1136/jmedgenet-2021-108064 (PMC9811090; doi:10.1136/jmedgenet-2021-108064), 2021-11-05
Supplement: jmedgenet-2021-108064supp004.pdf [file jmedgenet-2021-108064supp004.pdf]

SUPPLEMENTARY INFORMATION

Protein alignment *Sus scrofa* and *Homo sapiens*

CLUSTAL O(1.2.4) multiple sequence alignment

>XP\_013853381.2 kinesin-like protein KIF21A isoform X1 [*Sus scrofa*]

>NP\_001166935.1 kinesin-like protein KIF21A isoform 1 [*Homo sapiens*]

|                |                                                                                          |      |
|----------------|------------------------------------------------------------------------------------------|------|
| XP_013853381.2 | MWGAPDESSVRVAVRIRPQLAKERIEGCHICTSVTPGEPQVFLGKDKAFTFDYVFDIDSQ                             | 60   |
| NP_001166935.1 | MLGAPDESSVRVAVRIRPQLAKEKIEGCHICTSVTPGEPQVFLGKDKAFTFDYVFDIDSQ<br>* *****;*****            | 60   |
| XP_013853381.2 | QEQIYTQCIEKLEIEGCFEGYNATVFAYGQTGAGKTYTMGTGFDVNIIEEEQGIISRAVKH                            | 120  |
| NP_001166935.1 | QEQIYIQCIEKLEIEGCFEGYNATVFAYGQTGAGKTYTMGTGFDVNIIEEELGIIISRAVKH<br>*****;***              | 120  |
| XP_013853381.2 | LFKSIEEKKHASKINGLPSPDFKVNQFLELYNEEVLDLFDTRDIDAKNKKSNIRIHED                               | 180  |
| NP_001166935.1 | LFKSIEEKKHAIKINGLPAPDFKVNQFLELYNEEVLDLFDTRDIDAKSKKSNIRIHED<br>*****;*****                | 180  |
| XP_013853381.2 | SAGGIYTVGVTRTRVNTSEMMQCKLGLSRTTASTQMNQVSSRSHAIIFTIHLSTQTRMC                              | 240  |
| NP_001166935.1 | STGGIYTVGVTRTRVNTSEMMQCKLGLSRTTASTQMNQVSSRSHAIIFTIHCQTRVC<br>*;*****;***                 | 240  |
| XP_013853381.2 | PQIDTENAI DNKVI SESSQMNFEFETLAKFHFDLAGSERLKRGTGATGERAKEGINSINC                           | 300  |
| NP_001166935.1 | PQIDADNATDNKI IESSAQMNFEFETLAKFHFDLAGSERLKRGTGATGERAKEGINSINC<br>***;: ** **;*****;***** | 300  |
| XP_013853381.2 | LLALGNVISALGDKSKRATHVPYRDSKLRRLQDSLGGNSQTIMIACVSPSDRDFMETLN                              | 360  |
| NP_001166935.1 | LLALGNVISALGDKSKRATHVPYRDSKLRRLQDSLGGNSQTIMIACVSPSDRDFMETLN<br>*****                     | 360  |
| XP_013853381.2 | TLKYANRARNIKNKVMVNDQRASQQINALRNEITRLQMELMYKTKGRIIDEEGVESIND                              | 420  |
| NP_001166935.1 | TLKYANRARNIKNKVMVNDQRASQQINALRSEITRLQMELMYKTKGRIIDEEGVESIND<br>*****;*****               | 420  |
| XP_013853381.2 | MFHENAMLQTENNLRVRIKAMQETVDALRTRITQLVSDQANQVLARAGEGNEEISNMIH                              | 480  |
| NP_001166935.1 | MFHENAMLQTENNLRVRIKAMQETVDALRSRITQLVSDQANHVLARAGEGNEEISNMIH<br>*****;*****;*****         | 480  |
| XP_013853381.2 | SYIKEIEDLRAKLLESEAVNENLRKNLTRATARSFYSGSFAFSPTIMSSDKETIEIIDL                              | 540  |
| NP_001166935.1 | SYIKEIEDLRAKLLESEAVNENLRKNLTRATARAPYFSGSTFSPTILSSDKETIEIIDL<br>*****;*****;*****         | 540  |
| XP_013853381.2 | AKKDLEKLRKREKRRKRLQKLEESNREERSVAGKEDNIDTQEKKEEKGISERENNELE                               | 600  |
| NP_001166935.1 | AKKDLEKLRKREKRRKRLQKLEESNREERSVAGKEDNTDTQEKKEEKGISERENNELE<br>*****;*****;*****          | 600  |
| XP_013853381.2 | VEESQEVSDHEDEEEEEEDDIEGGESSDESDESDEKANYQADLANITCEIAIKQKL                                 | 660  |
| NP_001166935.1 | VEESQEVSDHEDEEEEEEDDIDGGESSDESDESDEKANYQADLANITCEIAIKQKL<br>*****;*****;*****            | 660  |
| XP_013853381.2 | IDELNSQKRLQTLKKQYEEKLMLLQHKIRDTQLERDQVLQNLGVSVESEEKAKKIRSE                               | 720  |
| NP_001166935.1 | IDELNSQKRLQTLKKQYEEKLMLLQHKIRDTQLERDQVLQNLGVSVESEEKAKKVRSE<br>*****;***                  | 720  |
| XP_013853381.2 | YEKQLQAMNKEQLRLQTAQKEHARLLKNQSQYEQQLKQLQDVMEMKTKVRLMKQMKEE                               | 780  |
| NP_001166935.1 | YEKQLQAMNKEQLRLQAAQKEHARLLKNQSQYEQQLKQLQDVMEMKTKVRLMKQMKEE<br>*****;*****                | 780  |
| XP_013853381.2 | QEKARLMESRRNREIAQLKKDQRKRDHQLRLLEAQKRNQEVVLRKTEEVTLARRQVRPM                              | 840  |
| NP_001166935.1 | QEKARLTESRRNREIAQLKKDQRKRDHQLRLLEAQKRNQEVVLRKTEEVTLARRQVRPM<br>*****                     | 840  |
| XP_013853381.2 | SDKVAGKVTRKLSDDAPVQDTGSSAAAIETDASRAGAQQKMRIPVARVQALPAPITNGT                              | 900  |
| NP_001166935.1 | SDKVAGKVTRKLSDDAPAQDTGSSAAAVETDASRTGAQQKMRIPVARVQALPTPATNGN<br>*****;*****;*****;***     | 900  |
| XP_013853381.2 | RKKYQRKGLTGRVFI SKTARMKWQLLERRVTDIIMQKMTISNMEADMNRLKQREELTKR                             | 960  |
| NP_001166935.1 | RKKYQRKGLTGRVFI SKTARMKWQLLERRVTDIIMQKMTISNMEADMNRLKQREELTKR<br>*****                    | 960  |
| XP_013853381.2 | REKLSKRREKIVKENGEGDKNVNINEEMESLTANIDYINDSISDCQANIMQEEAKEEG                               | 1020 |
| NP_001166935.1 | REKLSKRREKIVKENGEGDKNVNINEEMESLTANIDYINDSISDCQANIMQEEAKEEG<br>*****                      | 1020 |
| XP_013853381.2 | ETLDVTAVINACTL TEARYLLDHFLSMGINKGLQAAQKEAQIKVLEGRKQIEITSATQN                             | 1080 |
| NP_001166935.1 | ETLDVTAVINACTL TEARYLLDHFLSMGINKGLQAAQKEAQIKVLEGRKQIEITSATQN<br>*****                    | 1080 |
| XP_013853381.2 | QLLFHMLKEKAELNPELDALGHALQDLDSVPLENVEDSTDEDVPLNSPGSEGSSLSDDL                              | 1140 |
| NP_001166935.1 | QLLFHMLKEKAELNPELDALGHALQDLDSVPLENVEDSTDEDVPLNSPGSEGSTLSSDDL<br>*****;*****              | 1140 |
| XP_013853381.2 | MKLCGEVVKPKARRRRTTQMELLYADSSSELASDTSTGDASLPGPLTPVAEGQIEGMNTE                             | 1200 |
| NP_001166935.1 | MKLCGEVVKPKARRRRTTQMELLYADSSSELASDTSTGDASLPGPLTPVAEGQIEGMNTE<br>*****                    | 1200 |

```

XP_013853381.2 TS-TSAREKDLPPSGFPSPKIGSISRQSSLSEKKLPEPSPI TRRKVYEKA EKAKAKEQKH 1259
NP_001166935.1 TSGTSAREKELSPPPGLPSKIGSISRQSSLSEKKIPEPSVTRRKAYEKA EKSKAKEQKH 1260
** *****;* ** *;*****;*****;*****;*****;*****
XP_013853381.2 SDSGTSEASLSPSSPPSRPRNELNVFNRLTVSQGNTSVQQDKSDES DSSLSEVHSRSSR 1319
NP_001166935.1 SDSGTSEASLSPSSPPSRPRNELNVFNRLTVSQGNTSVQQDKSDES DSSLSEVH-RSSR 1319
***** ***** *****;*****;*****;*****;*****;*****

XP_013853381.2 RGIINPFPPSKGIRASPLQCVHIAEGHTKAVLCVDSTDDLLFTGSKDR TCKVWNLVTGQE 1379
NP_001166935.1 RGIINPFPAASKGIRAFPLQCIHIAEGHTKAVLCVDSTDDLLFTGSKDR TCKVWNLVTGQE 1379
***** ***** *****;*****;*****;*****;*****;*****

XP_013853381.2 IMSLGGHPNNVSVKYCNYTSLVFTVSTSYIKVWDIRDSAKCIRT LTSSGQVTLGDACST 1439
NP_001166935.1 IMSLGGHPNNVSVKYCNYTSLVFTVSTSYIKVWDIRDSAKCIRT LTSSGQVTLGDACSA 1439
***** ***** *****;*****;*****;*****;*****;*****;

XP_013853381.2 STSRTVAIPSGENQINQIALNPTGTFLYAASGNVMMWDLKRFQSTGKLTGHLGPVMCLT 1499
NP_001166935.1 STSRTVAIPSGENQINQIALNPTGTFLYAASGNVMMWDLKRFQSTGKLTGHLGPVMCLT 1499
***** ***** *****;*****;*****;*****;*****;*****

XP_013853381.2 VDQISNGQDLIITGSKDHYIRMFVTEGALGTVSPTHNFEPHYDGI EALTIQGDNLFSG 1559
NP_001166935.1 VDQISSGQDLIITGSKDHYIKMFDVTEGALGTVSPTHNFEPHYDGI EALTIQGDNLFSG 1559
***** ***** *****;*****;*****;*****;*****;*****

XP_013853381.2 SRDNGIKKWDLAQKDLLQQVPNAHKDWICALGVVPAHPVLLSGCRG GILKLWNMDFVPV 1619
NP_001166935.1 SRDNGIKKWDLTQKDLLQQVPNAHKDWICALGVVPAHPVLLSGCRG GILKVWMDTFMPV 1619
***** ***** *****;***** *****;*****;*****;*****;*****

XP_013853381.2 GEMKGDSPINAICVNSTHIFTAADDRTVRIWKTRNLQDQGISDTG DLGEDIASN 1674
NP_001166935.1 GEMKGDSPINAICVNSTHIFTAADDRTVRIWKARNLQDQGISDTG DLGEDIASN 1674
***** ***** *****;*****;*****;*****;*****;*****
    
```

```

#
#
# Percent Identity Matrix - created by Clustal2.1
#
#
    
```

```

1: XP_013853381.2 100.00 96.23
2: NP_001166935.1 96.23 100.00
    
```
